# Supplementary material for: Elevated Hepcidin Expression in Human Carotid Atheroma: Sex-Specific Differences and Associations with Plaque Vulnerability
Source: MDPI journal article supplement (doi:10.3390/ijms25031706), 2024-01-30
Supplement: s1 [file s1]

Supplementary Table SI. Basic clinical information

|                          | Total          | Asymptomatic   | Symptomatic    |       |
|--------------------------|----------------|----------------|----------------|-------|
| n                        | 58             | 8              | 50             | p     |
| Age, y $\pm$ SE          | 71.7 $\pm$ 1.1 | 74.4 $\pm$ 2.2 | 71.2 $\pm$ 1.2 | ns    |
| Sex, male (% , n)        | 65.5 (38)      | 62.5 (5)       | 66.0 (33)      | ns    |
| Diabetes mellitus, % (n) | 17.2 (10)      | 25.0 (2)       | 16.0 (8)       | ns    |
| Hypertesion, % (n)       | 74.1 (43)      | 62.5 (5)       | 76.0 (38)      | ns    |
| Smoking, % (n)           | 41.4 (24)      | 25.0 (2)       | 44.0 (22)      | ns    |
| Statin treatment, % (n)  | 46.5 (27)      | 62.5 (5)       | 44.0 (22)      | ns    |
| Total cholesterol        | 5.1 $\pm$ 0.2  | 5.1 $\pm$ 0.4  | 5.1 $\pm$ 0.2  | ns    |
| LDL                      | 2.8 $\pm$ 0.2  | 2.5 $\pm$ 0.5  | 2.8 $\pm$ 0.2  | ns    |
| HDL                      | 1.3 $\pm$ 0.1  | 1.9 $\pm$ 0.4  | 1.2 $\pm$ 0.1  | <0.05 |
| TG                       | 2.5 $\pm$ 0.4  | 1.6 $\pm$ 0.3  | 2.7 $\pm$ 0.5  | ns    |
